# Supplementary material for: Fabrication of Loose Nanofiltration Membranes with High Rejection Selectivity between Natural Organic Matter and Salts for Drinking Water Treatment
Source: MDPI journal article supplement (doi:10.3390/membranes12090887), 2022-09-15
Supplement: s1 [file s1]

# Fabrication of Loose Nanofiltration Membranes with High Rejection Selectivity between Natural Organic Matter and Salts for Drinking Water Treatment

Zhihai He <sup>1</sup>, Kunpeng Wang <sup>1</sup>, Yanling Liu <sup>2</sup>, Ting Zhang <sup>3</sup> and Xiaomao Wang <sup>1,\*</sup>

<sup>1</sup> State Key Joint Laboratory of Environment Simulation and Pollution Control, School of Environment, Tsinghua University, Beijing 100084, China

<sup>2</sup> State Key Laboratory of Pollution Control and Resource Reuse, College of Environmental Science and Engineering, Tongji University, Shanghai 200092, China

<sup>3</sup> School of Environmental Science and Engineering, Tianjin University, Tianjin 300350, China;

\* Correspondence: wangxiaomao@tsinghua.edu.cn; Tel.: +86-10-6278-1386

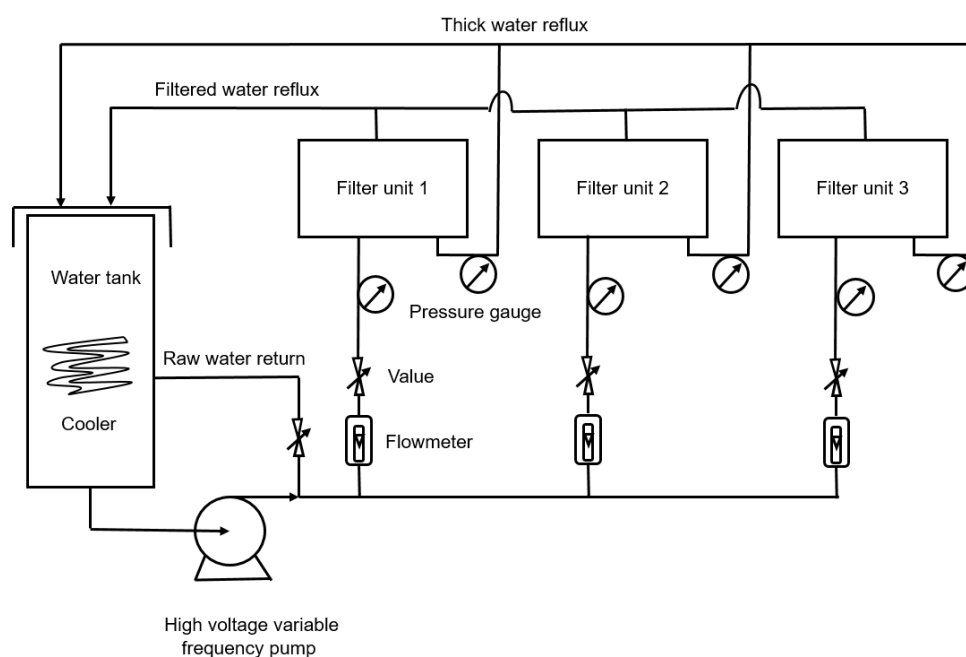

**Figure S1.** Schematic diagram of the cross-flow nanofiltration setup comprising of three parallel filtration cells.

**Table S1.** The B values of prepared membranes for monovalent and divalent ions.

| Membrane | B (Na <sub>2</sub> SO <sub>4</sub> )<br>(L/m <sup>2</sup> /h) | B (NaCl)<br>(L/m <sup>2</sup> /h) | B (MgCl <sub>2</sub> )<br>(L/m <sup>2</sup> /h) |
|----------|---------------------------------------------------------------|-----------------------------------|-------------------------------------------------|
| LNF1     | 49.8                                                          | 2330.1                            | 927.5                                           |
| LNF2     | 33.9                                                          | 1013.8                            | 394.8                                           |
| LNF3     | 19.5                                                          | 676.8                             | 266.1                                           |
| LNF4     | 98.9                                                          | 2682.3                            | 2557.8                                          |
| LNF5     | 58.3                                                          | 1031.4                            | 941.9                                           |
| LNF6     | 14.8                                                          | 1639.5                            | 239.6                                           |
